# Supplementary material for: in/out Isomerism of cyclophanes: a theoretical account of 2,6,15-trithia-[34,10][7]metacyclophane and [34,10][7]metacyclophane as well as their halogen substituted analogues
Source: Royal Society of Chemistry journal article supplement (doi:10.1039/c7cp00557a), 2017-01-01
Supplement: c7cp00557a1.pdf [file c7cp00557a1.pdf]

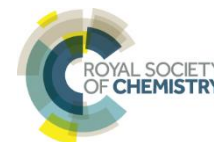

PCCP

## Supplementary information

### Supplementary information for in/out isomerism of cyclophanes: a theoretical account on 2,6,15-trithia-[3<sup>4,10</sup>][7]metacyclophane and [3<sup>4,10</sup>][7]metacyclophane, as well as their halogen substituted analogues

Received 00th January 20xx,  
Accepted 00th January 20xx

DOI: 10.1039/x0xx00000x

Milena Vujović,<sup>a</sup> Matija Zlatař,<sup>b</sup> Miloš Milčić<sup>a</sup> and Maja Gruden<sup>a†</sup>

www.rsc.org/

#### S1 Additional computational details

Additional calculations were performed using molecular mechanics as implemented in the Avogadro<sup>1,2</sup> program using MMFF94<sup>3</sup> force field and steepest descent algorithm. Also, Density Functional based Tight Binding<sup>4</sup> (DFTB) method as implemented within the DFTB+<sup>5</sup> program was employed for structural optimization, including and excluding the Lennard-Jones dispersion correction scheme.<sup>6</sup> In DFTB calculations maximum angular momentum for second and third row elements was set to p or d in order to compare the difference in DFTB2 and DFTB3 application for crowded and strained molecules. These results are shown in Tables S1, S2, S3 and S4.

#### S2 Additional results

In tables S1 through S4 additional results are given in regards to MM and DFTB calculations, as well as LDA/6-31G(d). In Tables S3 and S4 list C3-C and C3-S bond lengths for all employed methods. Tables S5 through S8 list EDA-NOCV results on various geometries of *in/out*-2,6,15-trithia-[3<sup>4,10</sup>][7]metacyclophane and *in/out*-[3<sup>4,10</sup>][7]metacyclophane and their halogen substituted analogues, as explained in the main text. SAPT results on model systems are shown in Tables S9 and S10, and EDA-NOCV results on model systems are presented in Tables S11 and S12. Most important contours of deformation density channels obtained via NOCV analysis on *in/out*-2,6,15-trithia-[3<sup>4,10</sup>][7]metacyclophane and its halogen substituted analogues, as well as the crystal structure of 2,6,15-trithia-[3<sup>4,10</sup>][7]metacyclophane are shown in Figures S1 and S2. Most important contours of deformation density channels obtained via NOCV analysis on model systems are shown in Figures S3 and S2.

**Table S1.** Comparison of calculated nonbonded contacts<sup>a,b</sup> and relative energies<sup>c</sup> of *in/out*-2,6,15-trithia-[3<sup>4,10</sup>][7]metacyclophane and their fluorine, chlorine and bromine containing analogues

| Method                                              |                     | <i>in</i> -H | <i>out</i> -H | <i>in</i> -F | <i>out</i> -F | <i>in</i> -Cl  | <i>out</i> -Cl | <i>in</i> -Br  | <i>out</i> -Br |
|-----------------------------------------------------|---------------------|--------------|---------------|--------------|---------------|----------------|----------------|----------------|----------------|
| MMFF94                                              | C1-C5               | 3.256        | 3.581         | 3.495        | 3.617         | 4.142          | 3.666          | 4.382          | 3.582          |
|                                                     | C2-C5               | 3.338        | 3.650         | 3.597        | 3.685         | 4.266          | 3.736          | 4.506          | 3.650          |
|                                                     | $\Delta E_{in-out}$ |              | -0.78         |              | 37.72         |                | 188.38         |                | 263.95         |
| DFTB                                                | C1-C5               | 3.158        | 3.648         | 3.622        | 3.641         | 4.281          | 3.675          | - <sup>d</sup> | 3.719          |
|                                                     | C2-C5               | 3.193        | 3.677         | 3.686        | 3.669         | 4.334          | 3.705          | - <sup>d</sup> | 3.750          |
|                                                     | $\Delta E_{in-out}$ |              | -2.22         |              | 41.04         |                | 149.36         |                | - <sup>d</sup> |
| DFTB –Lennard<br>Jones Dispersion                   | C1-C5               | 3.254        | 3.732         | 3.646        | 3.732         | - <sup>d</sup> | 3.756          | - <sup>d</sup> | 3.807          |
|                                                     | C2-C5               | 3.295        | 3.767         | 3.71         | 3.766         | - <sup>d</sup> | 3.791          | - <sup>d</sup> | 3.843          |
|                                                     | $\Delta E_{in-out}$ |              | -3.47         |              | 37.34         |                | - <sup>d</sup> |                | - <sup>d</sup> |
| DFTB<br>max. angular<br>momentum value <sup>d</sup> | C1-C5               | 3.159        | 3.649         | 3.637        | 3.645         | - <sup>d</sup> | 3.659          | - <sup>d</sup> | 3.718          |
|                                                     | C2-C5               | 3.194        | 3.677         | 3.701        | 3.672         | - <sup>d</sup> | 3.688          | - <sup>d</sup> | 3.748          |
|                                                     | $\Delta E_{in-out}$ |              | -2.33         |              | 38.94         |                | - <sup>d</sup> |                | - <sup>d</sup> |
| LDA/<br>6-31G(d)                                    | C1-C5               | 3.077        | 3.610         | 3.575        | 3.593         | 4.034          | 3.623          | 4.263          | 3.618          |
|                                                     | C2-C5               | 3.110        | 3.637         | 3.635        | 3.620         | 4.086          | 3.650          | 4.266          | 3.644          |
|                                                     | $\Delta E_{in-out}$ |              | -7.76         |              | 32.30         |                | 113.79         |                | 144.71         |

a- Nonbonded contacts are given in Å b- labelling of atoms is given in Figure 3 c- Relative energies between the two isomers  $\Delta E_{in-out}$  in kcal/mol d- Employed method failed to optimize these isomers

<sup>a</sup> Center for Computational Chemistry and Bioinformatics, Faculty of Chemistry, University of Belgrade, Studentski trg 12-16, 11001 Belgrade, Serbia.  
E-mail: sciencistom@gmail.com, mmilcic@chem.bg.ac.rs.

<sup>b</sup> Departement of Chemistry, Institute of Chemistry, Technology and Metallurgy, University of Belgrade, Njegoševa 12, Belgrade, Serbia.  
E-mail: matijaz@chem.bg.ac.rs

<sup>†</sup> Corresponding author. E-mail: gmaja@chem.bg.ac.rs

**Table S2.** Comparison of calculated nonbonded contacts<sup>a,b</sup> and relative energies<sup>c</sup> of *in/out*-[3<sup>4,10</sup>][7]metacyclophane and their fluorine, chlorine and bromine containing analogues

| Method                            |                     | <i>in</i> -H | <i>out</i> -H | <i>in</i> -F | <i>out</i> -F | <i>in</i> -Cl | <i>out</i> -Cl | <i>in</i> -Br | <i>out</i> -Br |
|-----------------------------------|---------------------|--------------|---------------|--------------|---------------|---------------|----------------|---------------|----------------|
| MMFF94                            | C1-C5               | 3.212        | 3.459         | 3.452        | 3.488         | 4.087         | 3.532          | 4.331         | 3.435          |
|                                   | C2-C5               | 3.312        | 3.539         | 3.571        | 3.569         | 4.220         | 3.615          | 4.463         | 3.515          |
|                                   | $\Delta E_{in-out}$ |              | -4.11         |              | 37.15         |               | 201.79         |               | 289.64         |
| DFTB                              | C1-C5               | 3.054        | 3.474         | 3.508        | 3.477         | 4.078         | 3.485          | 4.258         | 3.555          |
|                                   | C2-C5               | 3.106        | 3.510         | 3.604        | 3.513         | 4.194         | 3.524          | 4.357         | 3.596          |
|                                   | $\Delta E_{in-out}$ |              | -5.50         |              | 54.36         |               | 215.19         |               | 299.48         |
| DFTB –Lennard<br>Jones Dispersion | C1-C5               | 3.134        | 3.550         | 3.530        | 3.557         | 4.103         | 3.54           | 4.287         | 3.629          |
|                                   | C2-C5               | 3.193        | 3.596         | 3.627        | 3.602         | 4.219         | 3.586          | 4.385         | 3.677          |
|                                   | $\Delta E_{in-out}$ |              | -4.45         |              | 51.14         |               | 213.83         |               | 295.85         |
| LDA/<br>6-31G(d)                  | C1-C5               | 3.005        | 3.441         | 3.485        | 3.436         | 3.911         | 3.470          | 4.081         | 3.460          |
|                                   | C2-C5               | 3.054        | 3.478         | 3.576        | 3.473         | 4.007         | 3.509          | 4.155         | 3.499          |
|                                   | $\Delta E_{in-out}$ |              | -12.95        |              | 40.27         |               | 149.54         |               | 200.15         |

a- Nonbonded contacts are given in Å b- labelling of atoms is given in Figure 3 c- Relative energies between the two isomers  $\Delta E_{in-out}$  in kcal/mol**Table S3.** Comparison of calculated C3-C bond lengths<sup>a,b</sup> of *in/out*-[3<sup>4,10</sup>][7]metacyclophane and their fluorine, chlorine and bromine containing analogues

| Method                            |      | <i>in</i> -H | <i>out</i> -H | <i>in</i> -F | <i>out</i> -F | <i>in</i> -Cl | <i>out</i> -Cl | <i>in</i> -Br | <i>out</i> -Br |
|-----------------------------------|------|--------------|---------------|--------------|---------------|---------------|----------------|---------------|----------------|
| HF/3-21G                          | C3-C | 1.577        | 1.572         | 1.607        | 1.571         | 1.687         | 1.576          | 1.729         | 1.578          |
| HF-D3/3-21G                       | C3-C | 1.555        | 1.557         | 1.584        | 1.556         | 1.659         | 1.561          | 1.695         | 1.563          |
| MP2/6-31G(d)                      | C3-C | 1.560        | 1.556         | 1.588        | 1.556         | 1.651         | 1.561          | 1.698         | 1.562          |
| MP2-D3/6-31G(d)                   | C3-C | 1.539        | 1.541         | 1.567        | 1.541         | 1.651         | 1.547          | 1.656         | 1.547          |
| LDA/6-31G(d)                      | C3-C | 1.549        | 1.547         | 1.575        | 1.547         | 1.634         | 1.553          | 1.671         | 1.553          |
| LDA/TZP                           | C3-C | 1.545        | 1.544         | 1.572        | 1.544         | 1.634         | 1.548          | 1.679         | 1.548          |
| BP86/6-31G(d)                     | C3-C | 1.575        | 1.570         | 1.604        | 1.571         | 1.672         | 1.575          | 1.716         | 1.576          |
| BP86-D3/6-31G(d)                  | C3-C | 1.572        | 1.568         | 1.599        | 1.569         | 1.665         | 1.574          | 1.708         | 1.574          |
| PBE-D3/TZP                        | C3-C | 1.570        | 1.566         | 1.600        | 1.566         | 1.667         | 1.57           | 1.718         | 1.571          |
| M06-L/TZP                         | C3-C | 1.557        | 1.551         | 1.585        | 1.551         | 1.651         | 1.555          | 1.696         | 1.555          |
| M06-2X/6-31G(d)                   | C3-C | 1.563        | 1.557         | 1.591        | 1.557         | 1.652         | 1.563          | 1.687         | 1.564          |
| B3LYP/6-31G(d)                    | C3-C | 1.573        | 1.556         | 1.602        | 1.566         | 1.671         | 1.571          | 1.713         | 1.571          |
| B3LYP-D3/6-31G(d)                 | C3-C | 1.568        | 1.564         | 1.596        | 1.564         | 1.664         | 1.569          | 1.705         | 1.569          |
| MMFF94                            | C3-C | 1.568        | 1.550         | 1.587        | 1.551         | 1.661         | 1.553          | 1.964         | 1.856          |
| DFTB                              | C3-C | 1.566        | 1.560         | 1.595        | 1.560         | 1.700         | 1.564          | 1.776         | 1.567          |
| DFTB –Lennard<br>Jones Dispersion | C3-C | 1.587        | 1.575         | 1.615        | 1.575         | 1.724         | 1.578          | 1.816         | 1.581          |

a- Bond lengths are given in Å b- labelling of atoms is given in Figure 3

**Table S4.** Comparison of calculated C3-S bond lengths<sup>a,b</sup> of *in/out*-2,6,15-trithia-[3<sup>4,10</sup>][7]metacyclophane and their fluorine, chlorine and bromine containing analogues

| Method                            |      | <i>in</i> -H | <i>out</i> -H | <i>in</i> -F | <i>out</i> -F | <i>in</i> -Cl  | <i>out</i> -Cl | <i>in</i> -Br  | <i>out</i> -Br |
|-----------------------------------|------|--------------|---------------|--------------|---------------|----------------|----------------|----------------|----------------|
| HF/3-21G                          | C3-S | 1.929        | 1.936         | 1.973        | 1.936         | 2.100          | 1.941          | 2.186          | 1.944          |
| HF-D3/3-21G                       | C3-S | 1.898        | 1.915         | 1.936        | 1.913         | 2.045          | 1.918          | 2.125          | 1.920          |
| MP2/6-31G(d)                      | C3-S | 1.848        | 1.854         | 1.882        | 1.854         | 1.969          | 1.860          | 2.060          | 1.861          |
| MP2-D3/6-31G(d)                   | C3-S | 1.822        | 1.834         | 1.850        | 1.834         | 1.922          | 1.840          | 1.992          | 1.840          |
| LDA/6-31G(d)                      | C3-S | 1.847        | 1.856         | 1.881        | 1.856         | 1.979          | 1.969          | 2.190          | 1.861          |
| LDA/TZP                           | C3-S | 1.838        | 1.848         | 1.872        | 1.847         | 1.977          | 1.851          | - <sup>c</sup> | 1.852          |
| BP86/6-31G(d)                     | C3-S | 1.885        | 1.890         | 1.928        | 1.891         | 2.066          | 1.895          | 2.692          | 1.896          |
| BP86-D3/6-31G(d)                  | C3-S | 1.879        | 1.886         | 1.918        | 1.887         | 2.045          | 1.892          | 2.622          | 1.893          |
| PBE-D3/TZP                        | C3-S | 1.874        | 1.880         | 1.915        | 1.880         | 2.045          | 1.884          | - <sup>c</sup> | 1.885          |
| M06-L/TZP                         | C3-S | 1.858        | 1.858         | 1.896        | 1.863         | 2.017          | 1.867          | - <sup>c</sup> | 1.868          |
| M06-2X/6-31G(d)                   | C3-S | 1.844        | 1.847         | 1.880        | 1.848         | 1.994          | 2.045          | 2.134          | 1.856          |
| B3LYP/6-31G(d)                    | C3-S | 1.881        | 1.884         | 1.924        | 1.884         | 2.056          | 1.889          | 2.467          | 1.890          |
| B3LYP-D3/6-31G(d)                 | C3-S | 1.874        | 1.880         | 1.914        | 1.880         | 2.037          | 1.885          | 2.513          | 1.886          |
| MMFF94                            | C3-S | 1.871        | 1.856         | 1.892        | 1.856         | 1.982          | 1.860          | 2.026          | 1.859          |
| DFTB                              | C3-S | 1.896        | 1.898         | 1.936        | 1.896         | 3.000          | 1.901          | - <sup>c</sup> | 1.903          |
| DFTB –Lennard<br>Jones Dispersion | C3-S | 1.896        | 1.917         | 1.963        | 1.916         | - <sup>b</sup> | 1.921          | - <sup>c</sup> | 1.924          |

a- Bond lengths are given in Å b- labelling of atoms is given in Figure 3 c- Employed method failed to optimize these isomers

**Table S5.** EDA-NOCV Energy Decomposition Analysis<sup>a</sup> using PBE-D3/TZP//LDA/TZP level of theory on in/out- 2,6,15-trithia-[3<sup>4,10</sup>][7]metacyclophane and its halogen substituted analogues as well as the x-ray crystallographic structure<sup>b</sup> of in/out- 2,6,15-trithia-[3<sup>4,10</sup>][7]metacyclophane<sup>7</sup>

|                                | X-ray <sup>b</sup><br>(VAMMEB) | <i>in</i> -H      | <i>out</i> -H    | <i>in</i> -F      | <i>out</i> -F     | <i>in</i> -Cl     | <i>out</i> -Cl    | <i>in</i> -Br <sup>c</sup> | <i>out</i> -Br    |
|--------------------------------|--------------------------------|-------------------|------------------|-------------------|-------------------|-------------------|-------------------|----------------------------|-------------------|
| $E_{\text{Pauli}}$             | 178.84                         | 188.90            | 128.79           | 408.32            | 288.99            | 499.83            | 200.45            | -                          | 167.95            |
| $E_{\text{el}}$                | -101.66                        | -103.69           | -77.78           | -168.61           | -129.46           | -235.03           | -116.25           | -                          | -106.56           |
| $E_{\text{orb}}$               | -172.55                        | -178.30           | -152.41          | -321.90           | -280.62           | -261.07           | -168.65           | -                          | -132.34           |
| $E_{\text{orb}}^1(\Delta q)^d$ | -163.74<br>(0.94)              | -168.81<br>(0.96) | -144.6<br>(0.95) | -280.85<br>(1.21) | -258.57<br>(1.21) | -190.31<br>(1.22) | -151.26<br>(1.17) | -                          | -118.88<br>(1.18) |
| $E_{\text{orb}}^2(\Delta q)^d$ | -                              | -                 | -                | -12.68(0.24)      | -7.56(0.19)       | -16.35(0.39)      | -5.21(0.16)       | -                          | -3.76(0.14)       |
| $E_{\text{orb}}^3(\Delta q)^d$ | -                              | -                 | -                | -12.68(0.24)      | -7.55(0.19)       | -16.32(0.39)      | -5.20(0.16)       | -                          | -3.76(0.14)       |
| $E_{\text{disp}}$              | -1.17                          | -1.12             | -0.55            | -1.92             | -1.00             | -2.6              | -1.92             | -                          | -2.29             |
| $E_{\text{int}}$               | -96.54                         | -94.21            | -101.95          | -84.11            | -122.09           | 1.13              | -86.37            | -                          | -73.24            |
| $E_{\text{prep}}$              | 159.38                         | 8.25              | 23.38            | 24.58             | 22.76             | 53.4              | 24.95             | -                          | 24.53             |

a- Energy components are given in kcal/mol b- CSD ref. code VAMMEB c- Employed methods failed to optimize *in*-bromine-- 2,6,15-trithia-[3<sup>4,10</sup>][7]metacyclophane d- Orbital contribution is decomposed into individual contributions ( $E_{\text{orb}}^i$ ) and combined for alpha and beta spin; the charge transfer through these channels,  $\Delta q$ , is indicated in parentheses

**Table S6.** EDA-NOCV Energy Decomposition Analysis<sup>a</sup> on M06-L/TZP and LDA/TZP geometries of in/out- 2,6,15-trithia-[3<sup>4,10</sup>][7]metacyclophane, as well as the x-ray crystallographic structure<sup>b</sup> of in/out- 2,6,15-trithia-[3<sup>4,10</sup>][7]metacyclophane<sup>7</sup> using M06-L/TZP

|                                | X-ray <sup>b</sup><br>(VAMMEB) | <i>in</i> -H<br>(LDA/TZP <sup>c</sup> ) | <i>out</i> -H<br>(LDA/TZP <sup>c</sup> ) | <i>in</i> -H<br>(M06-L/TZP <sup>c</sup> ) | <i>out</i> -H<br>(M06-L/TZP <sup>c</sup> ) |
|--------------------------------|--------------------------------|-----------------------------------------|------------------------------------------|-------------------------------------------|--------------------------------------------|
| $E_{\text{Pauli}}$             | 178.59                         | 188.65                                  | 130.32                                   | 185.06                                    | 134.58                                     |
| $E_{\text{el}}$                | -100.49                        | -102.38                                 | -79.08                                   | -99.50                                    | -80.09                                     |
| $E_{\text{orb}}$               | -174.48                        | -180.65                                 | -154.47                                  | -182.06                                   | -157.2                                     |
| $E_{\text{orb}}^1(\Delta q)^d$ | -166.38 (0.94)                 | -171.16 (0.96)                          | -145.84 (0.95)                           | -172.32 (0.95)                            | -148.43 (0.95)                             |
| $E_{\text{orb}}^2(\Delta q)^d$ | -                              | -                                       | -                                        | -                                         | -                                          |
| $E_{\text{int}}$               | -96.38                         | -94.38                                  | -103.23                                  | -96.5                                     | -102.7                                     |
| $E_{\text{prep}}$              | 146.44                         | 10.11                                   | 26.89                                    | 10.18                                     | 23.91                                      |

a- Energy components are given in kcal/mol b- CSD ref. code VAMMEB c- level of theory employed to obtain geometries d- Orbital contribution is decomposed into individual contributions ( $E_{\text{orb}}^i$ ) and combined for alpha and beta spin; the charge transfer through these channels,  $\Delta q$ , is indicated in parentheses

**Table S7.** EDA-NOCV Energy Decomposition Analysis<sup>a</sup> on M06-2X/TZP and LDA/TZP geometries of in/out- 2,6,15-trithia-[3<sup>4,10</sup>][7]metacyclophane, as well as the x-ray crystallographic structure<sup>b</sup> of in/out- 2,6,15-trithia-[3<sup>4,10</sup>][7]metacyclophane<sup>7</sup> using M06-2X/TZP

|                                | X-ray <sup>b</sup><br>(VAMMEB) | <i>in</i> -H<br>(LDA/TZP <sup>c</sup> ) | <i>out</i> -H<br>(LDA/TZP <sup>c</sup> ) | <i>in</i> -H<br>(M06-2X/TZP <sup>c</sup> ) | <i>out</i> -H<br>(M06-2X/TZP <sup>c</sup> ) |
|--------------------------------|--------------------------------|-----------------------------------------|------------------------------------------|--------------------------------------------|---------------------------------------------|
| $E_{\text{Pauli}}$             | 184.03                         | 193.82                                  | 131.35                                   | 188.26                                     | 136.57                                      |
| $E_{\text{el}}$                | -107.54                        | -109.36                                 | -78.65                                   | -104.44                                    | -79.43                                      |
| $E_{\text{orb}}$               | -179.61                        | -185.71                                 | -162.38                                  | -187.9                                     | -165.87                                     |
| $E_{\text{orb}}^1(\Delta q)^d$ | -168.25 (0.95)                 | -173.23 (0.96)                          | -151.78 (0.96)                           | -175.22 (0.95)                             | -155.30 (0.96)                              |
| $E_{\text{orb}}^2(\Delta q)^d$ | -                              | -                                       | -                                        | -                                          | -                                           |
| $E_{\text{int}}$               | -103.12                        | -101.25                                 | -109.68                                  | -104.07                                    | -108.74                                     |
| $E_{\text{prep}}$              | 184.98                         | 44.92                                   | 64.34                                    | 45.21                                      | 60.54                                       |

a- Energy components are given in kcal/mol b- CSD ref. code VAMMEB c- level of theory employed to obtain geometries d- Orbital contribution is decomposed into individual contributions ( $E_{\text{orb}}^i$ ) and combined for alpha and beta spin; the charge transfer through these channels,  $\Delta q$ , is indicated in parentheses

**Table S8.** EDA-NOCV Energy Decomposition Analysis<sup>a</sup> on PBE-D3/QZ4P and LDA/TZP geometries of in/out- 2,6,15-trithia-[3<sup>4,10</sup>][7]metacyclophane, as well as the x-ray crystallographic structure<sup>b</sup> of in/out- 2,6,15-trithia-[3<sup>4,10</sup>][7]metacyclophane<sup>7</sup> using PBE-D3/QZ4P

|                                | X-ray <sup>b</sup><br>(VAMMEB) | <i>in</i> -H<br>(LDA/TZP <sup>c</sup> ) | <i>out</i> -H<br>(LDA/TZP <sup>c</sup> ) | <i>in</i> -H<br>(PBE-D3/QZ4P <sup>c</sup> ) | <i>out</i> -H<br>(PBE-D3/QZ4P <sup>c</sup> ) |
|--------------------------------|--------------------------------|-----------------------------------------|------------------------------------------|---------------------------------------------|----------------------------------------------|
| $E_{\text{Pauli}}$             | 179.25                         | 189.22                                  | 128.68                                   | 180.08                                      | 127.35                                       |
| $E_{\text{el}}$                | -100.93                        | -102.45                                 | -76.02                                   | -97.94                                      | -75.37                                       |
| $E_{\text{orb}}$               | -174.39                        | -180.57                                 | -154.36                                  | -179.14                                     | -154.30                                      |
| $E_{\text{orb}}^1(\Delta q)^d$ | -164.82 (0.95)                 | -170.05 (0.96)                          | -145.04 (0.95)                           | -169.08 (0.95)                              | -145.30 (0.95)                               |
| $E_{\text{orb}}^2(\Delta q)^d$ | -                              | -                                       | -                                        | -                                           | -                                            |
| $E_{\text{disp}}$              | -1.17                          | -1.12                                   | -0.55                                    | -1.14                                       | -0.52                                        |
| $E_{\text{int}}$               | -97.23                         | -94.91                                  | -102.25                                  | -98.14                                      | -102.84                                      |
| $E_{\text{prep}}$              | 156.68                         | 8.00                                    | 23.32                                    | 8.84                                        | 21.6                                         |

a- Energy components are given in kcal/mol b- CSD ref. code VAMMEB c- level of theory employed to obtain geometries d- Orbital contribution is decomposed into individual contributions ( $E_{\text{orb}}^i$ ) and combined for alpha and beta spin; the charge transfer through these channels,  $\Delta q$ , is indicated in parentheses

**Table S9.** Results of SAPT analysis<sup>b</sup> on model systems for [3<sup>4,10</sup>][7]metacyclophane and its halogen substituted analogues using aug-cc-pVTZ basis set for DF-SAPT2+3 calculations with aug-cc-pVTZ-JKFIT as auxiliary basis set for SCF density fitting computations and aug-cc-pVTZ-RI as auxiliary basis set for SAPT density fitting computations

| Molecule | X-Ar (Å) <sup>a</sup> | $E_{\text{electrostatic}}$ | $E_{\text{exchange}}$ | $E_{\text{induction}}$ | $E_{\text{dispersion}}$ | $E_{\text{total SAPT}}$ |
|----------|-----------------------|----------------------------|-----------------------|------------------------|-------------------------|-------------------------|
| out-H    |                       | -3.04                      | 11.04                 | -1.03                  | -7.77                   | -0.80                   |
| in-F     | 1.89                  | -28.18                     | 84.74                 | -4.15                  | -19.89                  | 32.51                   |
| out-F    |                       | -2.94                      | 9.94                  | -1.29                  | -7.52                   | -1.81                   |
| in-Cl    | 2.03                  | -80.33                     | 192.71                | -9.52                  | -38.44                  | 64.42                   |
| out-Cl   |                       | -2.81                      | 9.68                  | -1.36                  | -7.84                   | -2.34                   |
| in-Br    | 2.08                  | -108.41                    | 244.47                | -13.68                 | -43.71                  | 78.67                   |
| out-Br   |                       | -2.93                      | 9.96                  | -1.44                  | -8.13                   | -2.54                   |

a- X-Ar - the distance between halogen atom and center of the aromatic ring; b- Energy components are given in kcal/mol

**Table S10.** Results of SAPT analysis<sup>b</sup> on model systems for 2,6,15-trithia-[3<sup>4,10</sup>][7]metacyclophane and its halogen substituted analogues using aug-cc-pVTZ basis set for DF-SAPT2+3 calculations with aug-cc-pVTZ-JKFIT as auxiliary basis set for SCF density fitting computations and aug-cc-pVTZ-RI as auxiliary basis set for SAPT density fitting computations

| Molecule | X-Ar (Å) <sup>a</sup> | $E_{\text{electrostatic}}$ | $E_{\text{exchange}}$ | $E_{\text{induction}}$ | $E_{\text{dispersion}}$ | $E_{\text{total SAPT}}$ |
|----------|-----------------------|----------------------------|-----------------------|------------------------|-------------------------|-------------------------|
| out-H    |                       | -1.47                      | 5.29                  | -0.44                  | -5.43                   | -2.05                   |
| in-F     | 1.97                  | -20.87                     | 64.20                 | -3.29                  | -16.11                  | 23.93                   |
| out-F    |                       | -1.86                      | 4.88                  | -0.63                  | -5.34                   | -2.94                   |
| in-Cl    | 2.11                  | -58.71                     | 143.66                | -8.04                  | -31.36                  | 45.55                   |
| out-Cl   |                       | -1.76                      | 4.67                  | -0.67                  | -5.55                   | -3.30                   |
| in-Br    | 2.17                  | -90.91                     | 206.24                | -11.53                 | -38.22                  | 65.57                   |
| out-Br   |                       | -1.83                      | 4.81                  | -0.70                  | -5.74                   | -3.46                   |

a- X-Ar - the distance between halogen atom and center of the aromatic ring; b- Energy components are given in kcal/mol

**Table S11.** EDA-NOCV Energy Decomposition Analysis<sup>a</sup> on model system for [3<sup>4,10</sup>][7]metacyclophane and its halogen substituted analogues using PBE-D3/TZP level of theory

|                                | <i>in</i> -H | <i>out</i> -H | <i>in</i> -F | <i>out</i> -F | <i>in</i> -Cl | <i>out</i> -Cl | <i>in</i> -Br | <i>out</i> -Br |
|--------------------------------|--------------|---------------|--------------|---------------|---------------|----------------|---------------|----------------|
| $E_{\text{Pauli}}$             | 47.74        | 7.99          | 73.32        | 7.26          | 178.38        | 6.94           | 228.66        | 7.14           |
| $E_{\text{el}}$                | -19.65       | -3.05         | -27.22       | -2.77         | -73.76        | -2.46          | -99.93        | -2.63          |
| $E_{\text{orb}}$               | -10.23       | -2.65         | -9.04        | -3.37         | -29.47        | -3.22          | -37.47        | -3.29          |
| $E_{\text{orb}}^1(\Delta q)^b$ | -3.31 (0.13) | -0.52 (0.05)  | -2.77 (0.10) | -             | -7.37 (0.23)  | -0.51 (0.06)   | -9.04 (0.26)  | -              |
| $E_{\text{orb}}^2(\Delta q)^b$ | -1.22 (0.08) | -0.49 (0.05)  | -1.20 (0.07) | -             | -4.31 (0.17)  | -0.05 (0.05)   | -5.57 (0.22)  | -              |
| $E_{\text{orb}}^3(\Delta q)^b$ | -1.22 (0.08) | -0.48 (0.05)  | -1.19 (0.07) | -             | -4.32 (0.17)  | -0.05(0.05)    | -5.57 (0.22)  | -              |
| $E_{\text{disp}}$              | -4.04        | -3.42         | -4.36        | -3.43         | -4.09         | -3.75          | -3.85         | -3.85          |
| $E_{\text{int}}$               | 13.82        | -1.12         | 32.7         | -2.32         | 71.05         | -2.49          | -2.63         | -2.63          |
| $E_{\text{prep}}$              | 27.58        | 24.43         | 55.28        | 24.54         | 86.22         | 3.79           | 23.59         | 23.59          |

a- Energy components are given in kcal/mol b- Orbital contribution is decomposed into individual contributions ( $E_{\text{orb}}^i$ ); the charge transfer through these channels,  $\Delta q$ , is indicated in parentheses.

**Table S12.** EDA-NOCV Energy Decomposition Analysis<sup>a</sup> on model system for 2,6,15-trithia-[3<sup>4,10</sup>][7]metacyclophane and its halogen substituted analogues using PBE-D3/TZP level of theory

|                                | <i>in</i> -H | <i>out</i> -H | <i>in</i> -F | <i>out</i> -F | <i>in</i> -Cl | <i>out</i> -Cl | <i>in</i> -Br | <i>out</i> -Br |
|--------------------------------|--------------|---------------|--------------|---------------|---------------|----------------|---------------|----------------|
| $E_{\text{Pauli}}$             | 36.13        | 3.28          | 53.99        | 3.04          | 128.53        | 2.82           | -             | 2.91           |
| $E_{\text{el}}$                | -15.47       | -1.55         | -20.12       | -1.77         | -53.44        | -1.53          | -             | -1.65          |
| $E_{\text{orb}}$               | -7.37        | -1.24         | -5.93        | -1.78         | -21.1         | -1.67          | -             | -1.69          |
| $E_{\text{orb}}^1(\Delta q)^b$ | -2.87 (0.12) | -             | -2.23 (0.10) | -             | -6.22 (0.22)  | -              | -             | -0.39 (0.05)   |
| $E_{\text{orb}}^2(\Delta q)^b$ | -0.86 (0.07) | -             | -0.89 (0.06) | -             | -3.22 (0.14)  | -              | -             | -              |
| $E_{\text{orb}}^3(\Delta q)^b$ | -0.85 (0.07) | -             | -0.89 (0.06) | -             | -3.22 (0.14)  | -              | -             | -              |
| $E_{\text{disp}}$              | -3.85        | -3.04         | -4.03        | -3.09         | -4.02         | -3.32          | -             | -3.40          |
| $E_{\text{int}}$               | 9.44         | -2.55         | 23.91        | -3.6          | 49.97         | -3.7           | -             | -3.83          |
| $E_{\text{prep}}$              | 18.54        | 16.16         | 41.2         | 16.47         | 58.35         | 15.96          | -             | 15.89          |

a- Energy components are given in kcal/mol b- Orbital contribution is decomposed into individual contributions ( $E_{\text{orb}}^i$ ); the charge transfer through these channels,  $\Delta q$ , is indicated in parentheses.

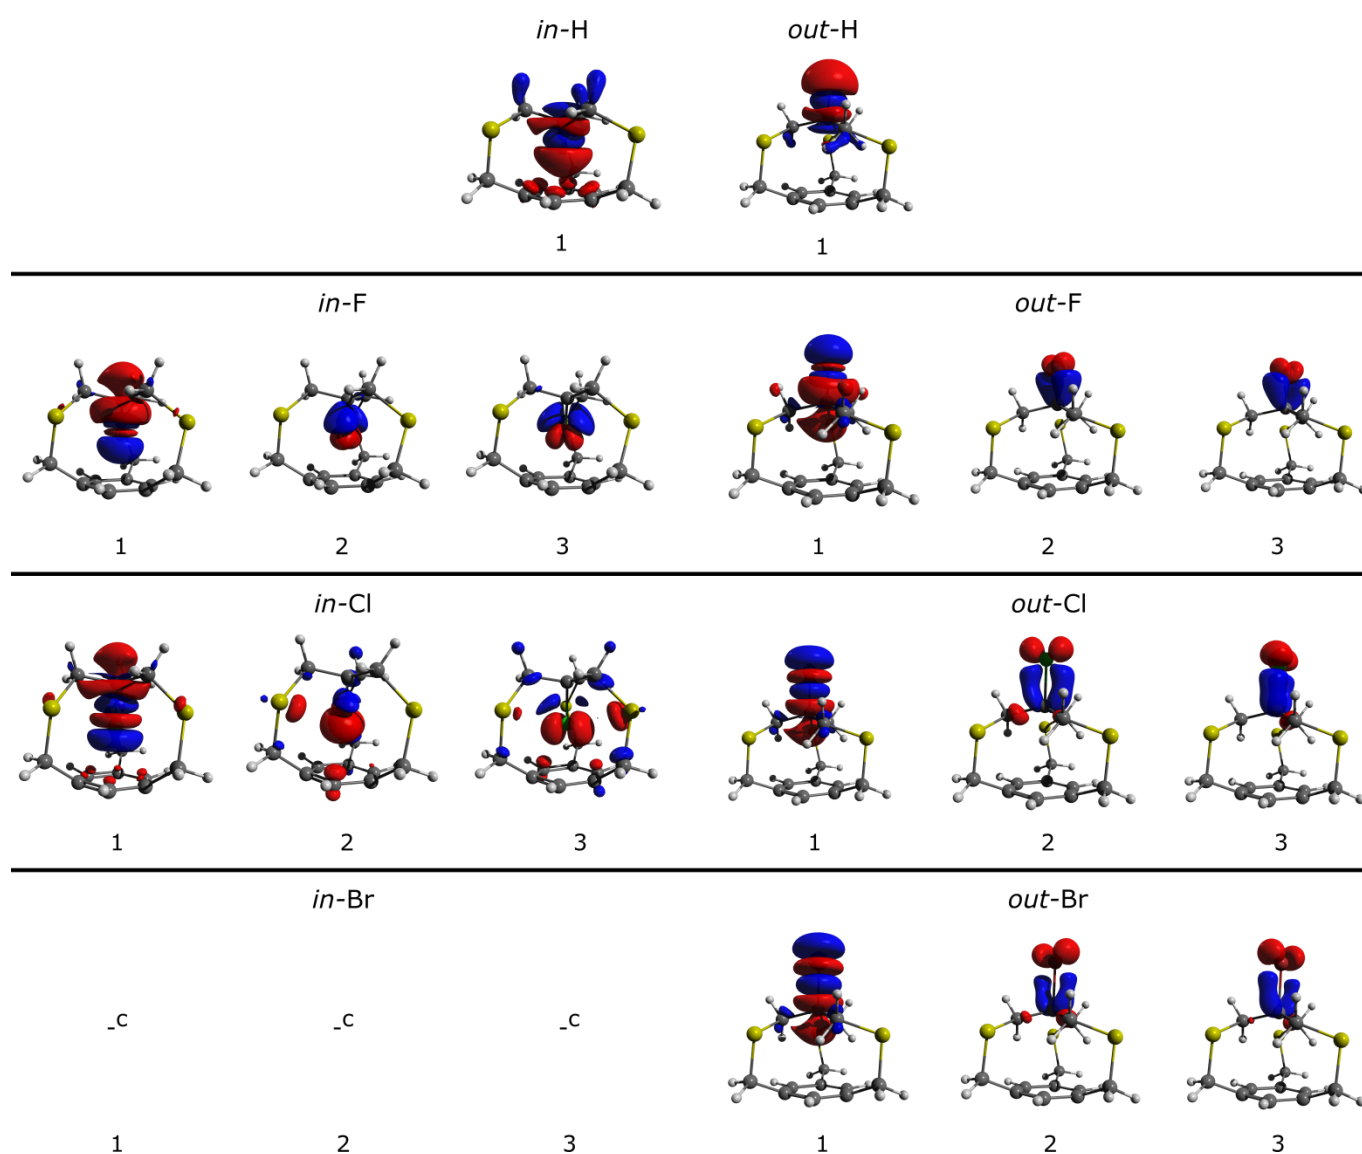**Figure S1.** Most important contours of deformation density channels obtained via NOCV analysis using PBE-D3/TZP/LDA/TZP level of theory of 2,6,15-trithia-[3<sup>4,10</sup>][7]metacyclophane; electron flow is depicted from red to blue; isovalue 0.002au. The numbers correspond to the values of  $i$  in  $E_{\text{orb}}^i$ .

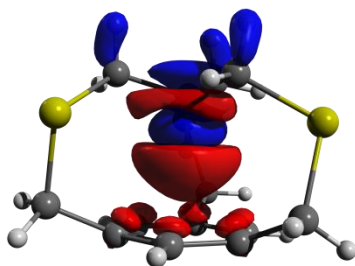

**Figure S2.** Most important contour of deformation density channels obtained via NOCV analysis on the X-ray structure employing PBE-D3/TZP, electron flow is depicted from red to blue; isovalue  $0.002a_u$ ,  $E_{orb}^1 = -163.74 \frac{kcal}{mol}$ ,  $\Delta q = 0.94$

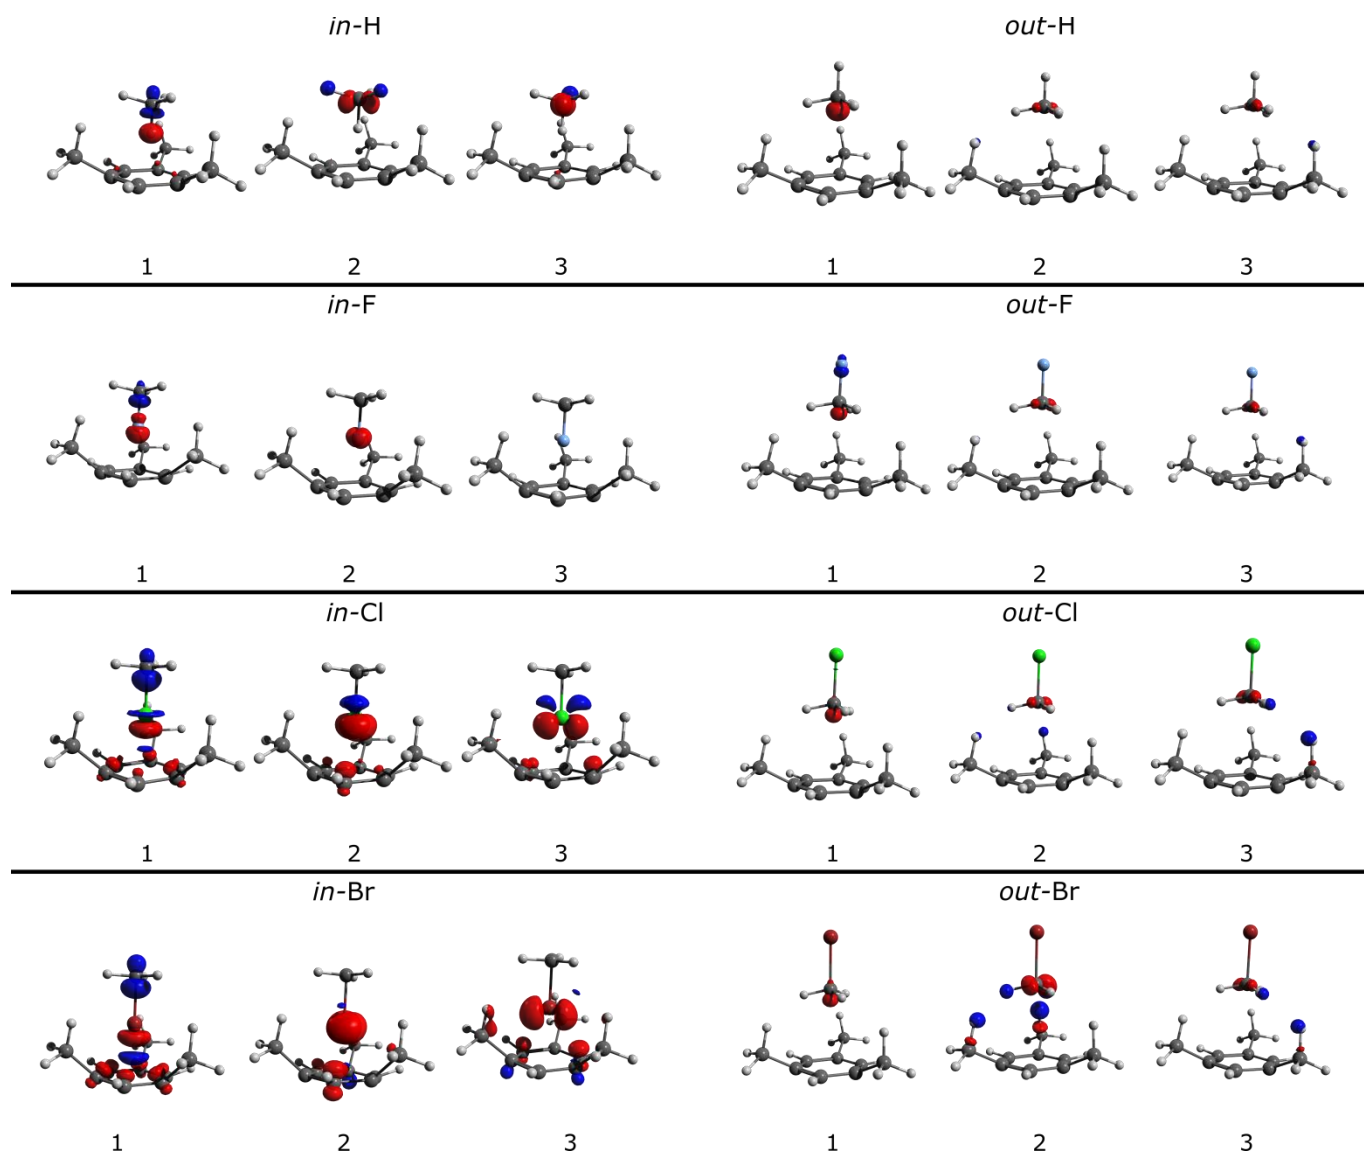

**Figure S3.** Most important contours of deformation density channels obtained via NOCV analysis on the model system for  $[3^{4,10}][7]$ metacyclophane and its halogen substituted analogues using PBE-D3/TZP; electron flow is depicted from red to blue; isovalue  $0.002a_u$ . The numbers correspond to the values of  $i$  in  $E_{orb}^i$ .

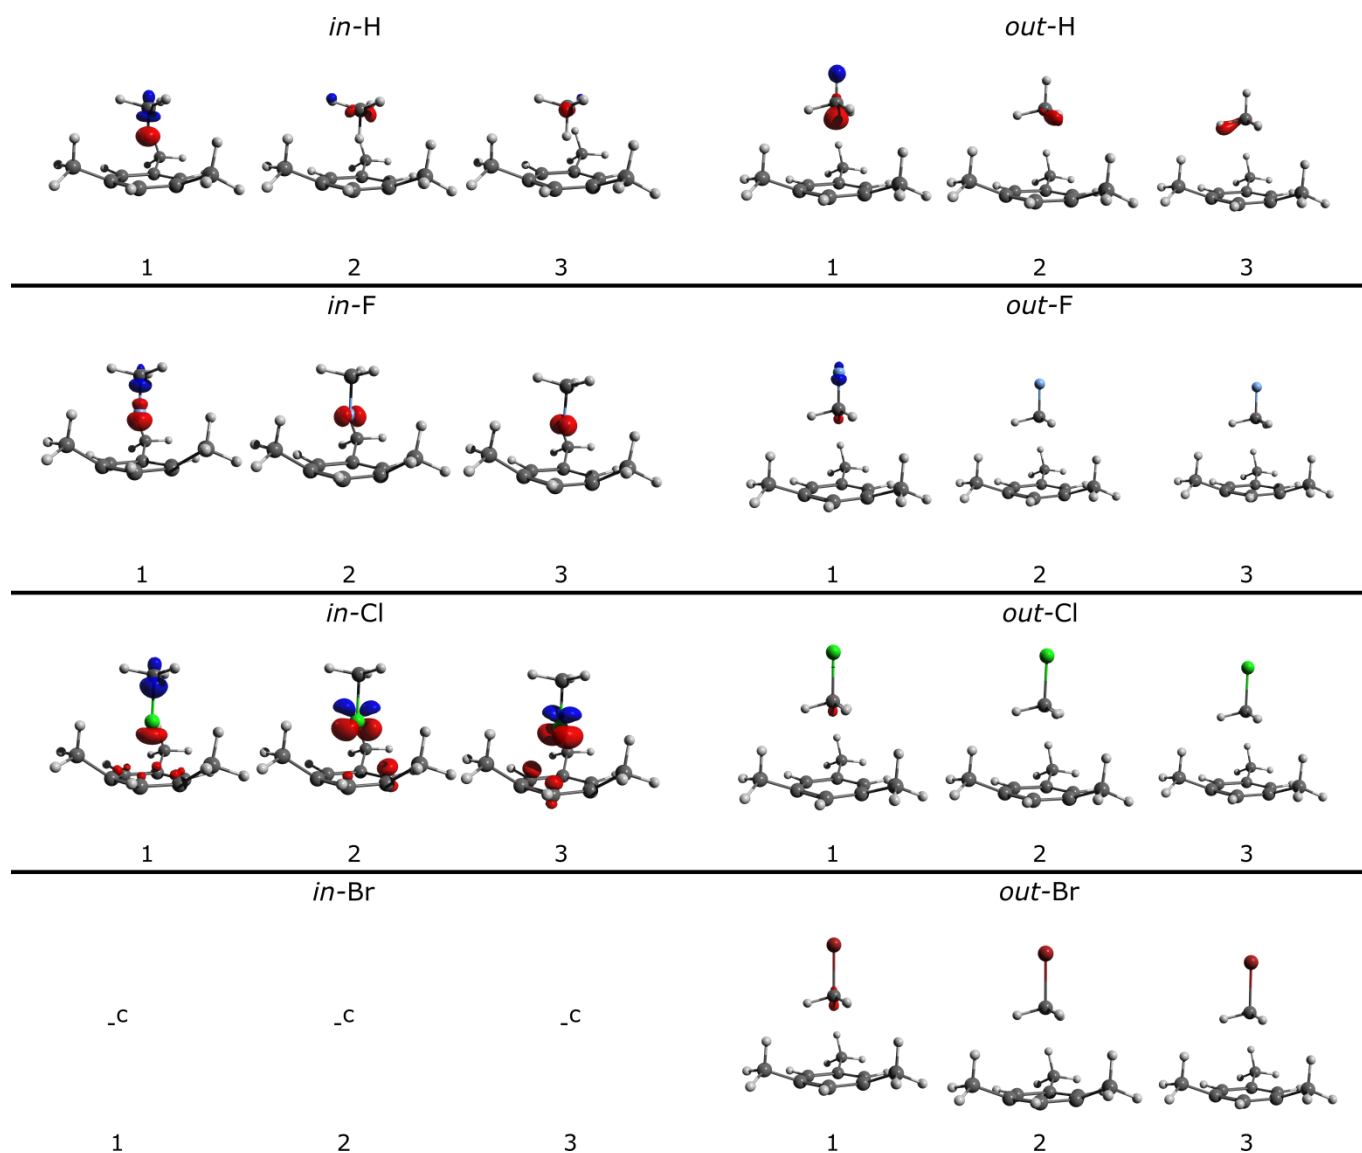

**Figure S4.** Most important contours of deformation density channels obtained via NOCV analysis on the model system for 2,6,15-trithia-[3<sup>4,10</sup>][7]metacyclophane and its halogen substituted analogues using PBE-D3/TZP; electron flow is depicted from red to blue; isovalue 0.002au. The numbers correspond to the values of  $i$  in  $E_{orb}$ .

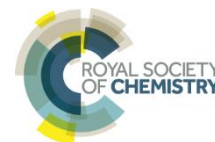

PCCP

## Supplementary information

## References

1. Avogadro: an open-source molecular builder and visualization tool, Version 1.1.1., <http://avogadro.openmolecules.net/>).
2. M. D. Hanwell, D. E. Curtis, D. C. Lonie, T. Vandermeersch, E. Zurek and G. R. Hutchison, *J. Cheminformatics*, 2012, **4**, 17.
3. T. A. Halgren, *J. Comput. Chem.*, 1996, **17**, 490-519.
4. M. Elstner, D. Porezag, G. Jungnickel, J. Elsner, M. Haugk, T. Frauenheim, S. Suhai and G. Seifert, *Phys. Rev. B*, 1998, **58**, 7260.
5. B. Aradi, B. Hourahine and T. Frauenheim, *J. Phys. Chem. A*, 2007, **111**, 5678.
6. M. Elstner, P. Hobza, T. Frauenheim, S. Suhai and E. Kaxiras, *Chem. Phys.*, 2001, **114**, 5149.
7. R. A. J. Pascal, C. G. Winans and D. Van Engen, *J. Am. Chem. Soc.*, 1989, **111**, 3007-3010.
